# Supplementary material for: Design and synthesis of CoMoO4–NiMoO4·xH2O bundles with improved electrochemical properties for supercapacitors
Source: Royal Society of Chemistry journal article supplement (doi:10.1039/c2ta00163b), 2012-11-14
Supplement: c2ta00163b.pdf [file c2ta00163b.pdf]

## Supporting information

### **Design and synthesis of CoMoO<sub>4</sub>/NiMoO<sub>4</sub>·xH<sub>2</sub>O bundles owing improved electrochemical properties for supercapacitors**

Mao-Cheng Liu <sup>a</sup>, Ling-Bin Kong <sup>a,b,\*</sup>, Chao Lu <sup>a</sup>, Xue-Jing Ma <sup>a</sup>, Xiao-Ming Li <sup>a</sup>,  
Yong-Chun Luo <sup>b</sup> and Long Kang <sup>b</sup>

<sup>a</sup> *State Key Laboratory of Gansu Advanced Non-ferrous Metal Materials, Lanzhou University of Technology, Lanzhou 730050, PR China*

<sup>b</sup> *School of Materials Science and Engineering, Lanzhou University of Technology, Lanzhou 730050, PR China*

\* Corresponding author. Tel.: +86-931-2976579; fax: +86-931-2976578. E-mail

address: [konglb@lut.cn](mailto:konglb@lut.cn)

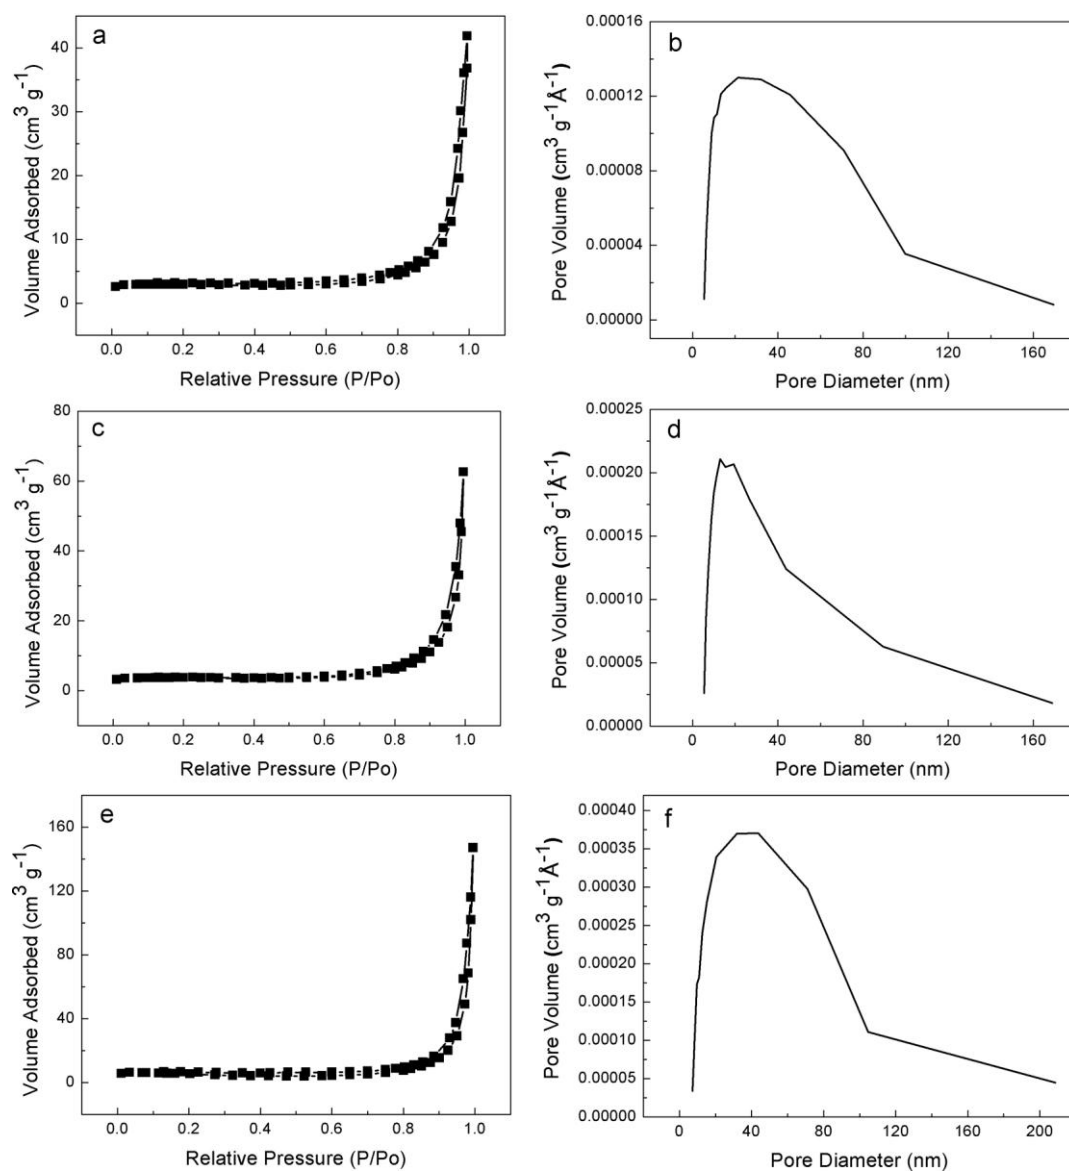

Fig. S1 (a) N<sub>2</sub> adsorption/desorption isotherms and (b) pore size distribution curve of CoMoO<sub>4</sub> nanorods. (c) N<sub>2</sub> adsorption/desorption isotherms and (d) pore size distribution curve of NiMoO<sub>4</sub>·xH<sub>2</sub>O nanorods. (e) N<sub>2</sub> adsorption/desorption isotherms and (f) pore size distribution curve of CoMoO<sub>4</sub>/NiMoO<sub>4</sub>·xH<sub>2</sub>O bundles.

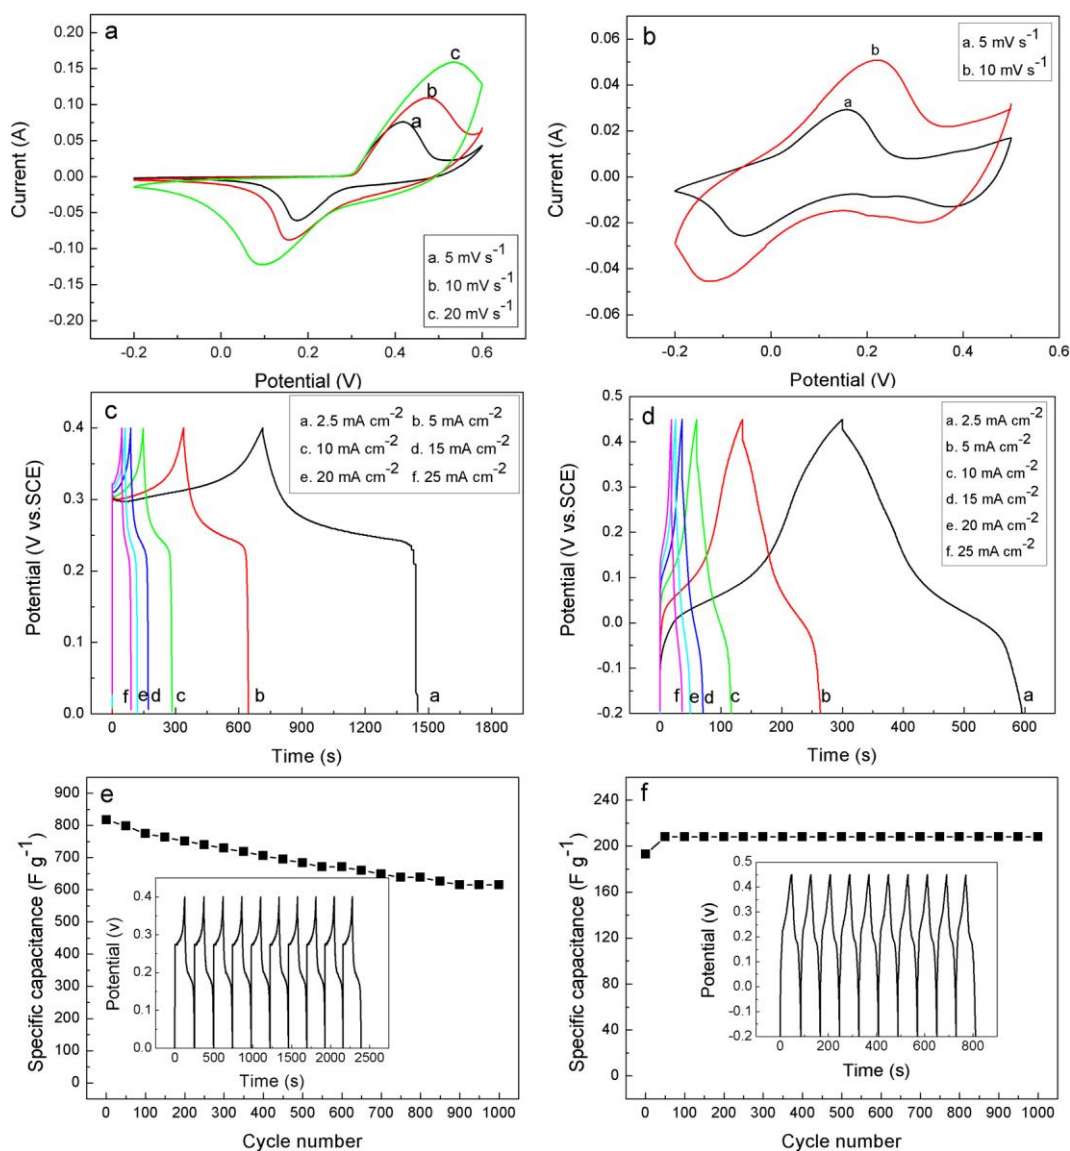

Fig. S2 CV curves of (a)  $\text{NiMoO}_4 \cdot x\text{H}_2\text{O}$  and (b)  $\text{CoMoO}_4$ . Charge/discharge curves of (c)  $\text{NiMoO}_4 \cdot x\text{H}_2\text{O}$  and (d)  $\text{CoMoO}_4$ . Cycling performance of (e)  $\text{NiMoO}_4 \cdot x\text{H}_2\text{O}$  and (f)  $\text{CoMoO}_4$ .

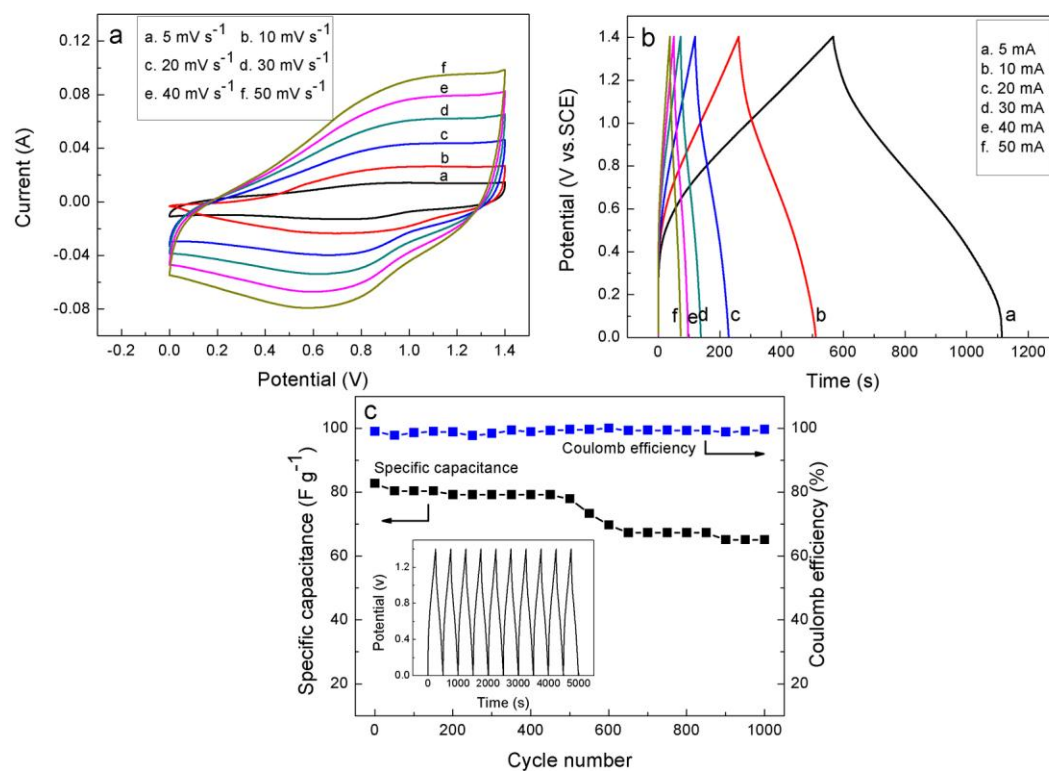

Fig. S3 (a) CV curves and (b) Charge/discharge curves of AC and  $\text{CoMoO}_4/\text{NiMoO}_4 \cdot x\text{H}_2\text{O}$  based asymmetric supercapacitor (c) Cycling performance of asymmetric supercapacitor.
